# Supplementary material for: A novel prognostic classification integrating lipid metabolism and immune co-related genes in acute myeloid leukemia
Source: Front Immunol. 2023 Nov 10;14:1290968. doi: 10.3389/fimmu.2023.1290968 (PMC10667441; doi:10.3389/fimmu.2023.1290968)
Supplement: Supplementary file 5 [file Table_1.xlsx]

## Sheet: Sheet 1
sampleID
